# Non-additive QTL mapping of lactation traits in 124,000 sequence-imputed cattle reveals novel recessive loci

Edwardo GM Reynolds<sup>1</sup>, Thomas Lopdell<sup>2</sup>, Yu Wang<sup>2</sup>, Kathryn M Tiplady<sup>1,2</sup>, Chad S Harland<sup>2</sup>, Thomas JJ Johnson<sup>2</sup>, Catherine Neeley<sup>2</sup>, Katie Carnie<sup>2</sup>, Richard G Sherlock<sup>2</sup>, Christine Couldrey<sup>2</sup>, Stephen R Davis<sup>2</sup>, Bevin L Harris<sup>2</sup>, Richard J Spelman<sup>2</sup>, Dorian J Garrick<sup>1</sup>, Mathew D Littlejohn<sup>1,2</sup>

1. Massey University, New Zealand
2. Livestock Improvement Corporation, Hamilton, New Zealand

Correspondence should be addressed to EGMR ([edwardo.reynolds.1@uni.massey.ac.nz](mailto:edwardo.reynolds.1@uni.massey.ac.nz))

## 1 **Abstract**

2 Deleterious recessive conditions have primarily been studied in a Mendelian disease context.  
3 Recently, several large effect, deleterious recessive mutations were discovered via non-additive  
4 GWAS of quantitative growth and developmental traits in cattle. This showed quantitative traits  
5 can be used as proxies of genetic disorders if they are indicative of whole animal health status  
6 and susceptible to underlying genetic conditions. Lactation traits might also reflect genetic  
7 disorders in cattle, given the increased energy demands of lactation and the substantial stresses  
8 imposed on the animal. Here, we report a screen of over 124,000 cows for recessive effects  
9 based on lactation traits. We discovered novel loci associated with five large recessive impacts  
10 on milk yield traits represented by missense variants (DOCK8, IL4R, KIAA0556, and SLC25A4)  
11 or premature stop variants (ITGAL, LRCH4, and RBM34) as candidate causal mutations. On milk  
12 composition traits, we identified several small effect dominance contributions to previously  
13 reported additive QTL. In contrasting analyses of milk yield and milk composition phenotypes, we  
14 note differing genetic architectures. Milk yield phenotypes presented lower heritabilities and fewer  
15 additive QTL, but higher non-additive genetic variance and a higher proportion of loci exhibiting  
16 dominance compared to milk composition phenotypes. Large-effect recessive QTL are  
17 segregating at surprisingly high frequencies in cattle. We speculate that the differences in genetic  
18 architecture between milk yield and milk composition phenotypes derive from underlying  
19 dissimilarities in the cellular and molecular representation of these traits. Lactation yields may act  
20 as a better proxy than milk composition traits for a wide range of underlying biological disorders  
21 affecting animal fitness

22

23

## 24 **Background**

25 Non-additive genetic effects are best known and studied in Mendelian disease contexts, where  
26 recessive conditions have been shown to have major deleterious impacts on the health and  
27 performance of animals. These studies have mostly used a 'forward genetics' approach, where  
28 observation of a disease phenotype precedes fine mapping and sequencing to highlight the

29 mutation [1–3]. The reverse approach has also been applied, where candidate loss of function  
30 genotypes were identified and phenotyping was subsequently conducted to detect the impact of  
31 the mutation [4,5]. Though examples remain limited, genome-wide association approaches have  
32 been used to investigate non-additive effects in quantitative traits. Recent studies include the  
33 investigation of complex traits in both humans [6] and cattle [7–11]. Reynolds *et al.* identified  
34 several recessive mutations in cattle with major negative impacts on growth and developmental  
35 traits, where some of these loci represented underlying genetic disorders [11].

36

37 The concept of using routinely gathered, quantitative traits as proxies of genetic disorders is  
38 based on the idea that phenotypes such as growth or liveweight can be indicative of whole animal  
39 health status, where reduced growth might be due to some underlying genetic disorder, and that  
40 those effects could be detected via GWAS. It is therefore of interest to consider what other traits  
41 might serve as proxies of animal fitness, with a view to extend the utility of this approach.

42 Lactation traits such as milk volume comprise one of the most commonly targeted classes of  
43 quantitative traits studied in cattle, where additive analyses of these traits have presented  
44 numerous candidate causative genes such as *DGAT1* [12], *GHR* [13], *ABCG2* [14], *GPAT4* [15],  
45 and *MGST1* [16]. Lactation traits might also be reflective of genetic disorders, given the increased  
46 energy demands of lactation and the substantial metabolic and physiological stresses imposed on  
47 the animal [17]. We wondered therefore whether the application of non-additive models to  
48 lactation data might identify further recessive mutations, and to this end, have conducted non-  
49 additive GWAS for milk traits in 124,000 animals. We contrast the additive and non-additive  
50 genetic architectures of milk yield traits and milk composition traits. Finally, we describe the  
51 discovery of novel major effect recessive loci, highlighting candidate mutations that potentially  
52 underlie undiagnosed recessive disorders.

53

54

## 55 **Methods**

### 56 *Animal populations*

57 The dataset reported in this study consists of 124,364 New Zealand dairy cattle. These animals  
58 come from a mixed breed population, where 20,893 are 16/16<sup>th</sup>'s Holstein-Friesian (HF), 13,184  
59 are 16/16<sup>th</sup>'s Jersey (J), 67,520 are crosses involving varying proportions of the two breeds  
60 (HFXJ), and 22,767 are HF or J crossbreeds with minor proportions of other breeds including  
61 Ayrshire, Brown Swiss, or Hereford (and other crosses). An individual's breed may be coded as  
62 16/16<sup>th</sup>s, however, this does not preclude the possibility that an ancestor may be crossbred as  
63 matings between 15/16<sup>th</sup>s and 16/16<sup>th</sup>s animals result in 16/16<sup>th</sup>s offspring. The animals were  
64 born between 1990 and 2018 with a mean birth year of 2010.

65

### 66 *Phenotypes*

67 Five first-lactation milk phenotypes were investigated in this study. These include three milk yield  
68 traits; milk volume (L/Lactation; a lactation refers to a standardised 268 day lactation; N =  
69 124,356), milk protein yield (kg/Lactation; N = 124,356), and milk fat yield (kg/Lactation; N =  
70 124,356), and two milk composition traits; milk protein percentage (%; N = 124,363), and milk fat  
71 percentage (%; N = 124,363). Milk protein yield and milk fat yield are the product of the milk  
72 volume multiplied by the milk protein percentage or milk fat percentage, respectively.

73 Prior to genetic analysis, phenotypes were adjusted based on effects obtained from the national  
74 genetic evaluation of the entire cattle population (30 million animals) which fits mixed linear  
75 models. Fixed effects in that model included contemporary group, age at calving, stage of  
76 lactation, and record type (records may be made at am milkings, pm milkings, or both). Since  
77 animals have varying numbers of herd-test measurements within each milk trait, these were  
78 aggregated to a phenotypic deviation such that each animal has a single record and a  
79 corresponding weighting reflecting the amount of information in the record [18].

80

### 81 *Sequence-based imputation reference panel*

82 Whole genome sequencing was performed on 1,300 animals that were mostly ancestral sires,  
83 these animals comprised the reference population for sequence-based imputation. Animals  
84 comprising HF (N=306), J (N=219), HFXJ (N=717), or other breeds and crossbreeds (N = 58)

85 were sequenced on Illumina HiSeq 2000 instruments targeting 100bp paired-end reads.  
86 Sequence data were aligned to the ARS-UCD1.2 reference genome assembly using BWA 0.7.17  
87 [19] resulting in a mean read depth of 15x. Variant calling was performed using GATK v4.0.6.0  
88 [20], followed by variant filtering via Variant Quality Score Recalibration. Using animals with high  
89 read depth (>10x, N = 850), variants were filtered out if they were singletons, were multi-allelic,  
90 had a map quality score lower than 50, or had a Mendelian error rate above 5%. These criteria  
91 left 21,005,869 whole genome sequence variants from the 850 highest read depth animals,  
92 where these positions were then extracted from the sequence data on all 1,300 animals and  
93 phased using Beagle 5.0 [21] to create the sequence-based imputation reference panel.

94

### 95 *Genotyping*

96 The study animals (N = 124,364) were genotyped using SNP chips, where either ear-punch  
97 tissue samples or blood samples were used for DNA extraction. Genotyping was performed using  
98 a variety of platforms including GeneSeek GGPv1, GGPv2, GGPv2.1, GGPv3, GGPv3.1, GGPv4,  
99 GGP50kv1, GGP50kv1.1, Illumina BovineSNP50v1, Illumina BovineSNP50v2, or BovineHD SNP-  
100 chips. Samples were processed for DNA extraction at GeneMark (Hamilton, New Zealand) using  
101 Qiagen BioSprint kits or GeneSeek (Lincoln, NE, USA) using Life Technologies' MagMAX  
102 system.

103

### 104 *Consolidation of SNP-chip panels for sequence imputation*

105 Imputation from genotyping panels to sequence resolution was performed as described in Wang  
106 *et al.* [22]. Genotype panels were grouped into four sets; GGP panels (GGPv1, GGPv2,  
107 GGPv2.1, GGPv3, GGPv3.1, and GGPv4), 50K panels (BovineSNP50v1, and BovineSNP50v2),  
108 GGP50k panels (GGP50kv1, GGP50kv1.1), and the BovineHD panel. Animals genotyped on the  
109 GGP panels were imputed to the BovineSNP50v1 panel, then combined with the physically  
110 genotyped 50K panel animals and further imputed to the BovineHD panel. Animals genotyped on  
111 the GGP50k panels were separately imputed to the BovineHD panel. In order to incorporate the  
112 large amount of custom content genotyped on the GGPv3 platform, we conducted similar

113 imputation steps to impute all animals to GGPv3. We then combined the imputed and physically  
114 genotyped panels (imputed HD, imputed GGPv3, and physically genotyped HD), and imputed  
115 these animals to sequence resolution using the sequence-based imputation reference population,  
116 described above. Post-imputation filtering to remove very rare variants (homozygous alternate  
117 count  $\leq 5$ ) was performed, as well as a filter to remove variants that imputed poorly based on the  
118 dosage  $R^2$  statistic ( $DR^2$ ;  $DR^2 < 0.7$ ). After the application of these filters, 16,640,294 variants  
119 remained for GWAS and further analysis.

120

### 121 *Genotypes for population structure adjustment*

122 We used content from the Bovine SNP50 chip platform to account for the population structure of  
123 the sample. From the initial 54,708 autosomal SNPs, we filtered to remove markers with high  
124 missing genotype rates ( $> 0.01$ ), low minor allele frequency ( $< 0.02$ ), or high deviations from  
125 expected Hardy-Weinberg equilibrium ( $> 0.15$ , calculated within breed). This was followed by  
126 further filtering to remove markers that appeared to impute poorly ( $DR^2 > 0.9$ ), and markers in  
127 high LD with another marker on the panel (pairwise  $R^2 > 0.9$ , within 1 Mbp). These criteria  
128 resulted in a set of 31,451 SNP chip markers for subsequent analysis.

129

### 130 *Heritability estimates*

131 We estimated breed-specific additive and dominance heritabilities using genomic relationship  
132 matrices (GRMs) using GCTA software [6,23]. Variance components were estimated from  
133 purebred individuals (HF = 20,893, J = 13,184), using the same set of 31,451 filtered  
134 BovineSNP50 SNPs used for population structure adjustment (filters described in the previous  
135 section). GCTA estimates variance components using a restricted maximum likelihood (REML)  
136 approach, where additive heritability ( $h^2$ ) is the ratio of additive genetic variance to phenotypic  
137 variance, and dominance heritability ( $\delta^2$ ) is calculated as the ratio of dominance genetic variance  
138 to phenotypic variance.

139

140 GWAS

141 *Model Overview*

142 We applied a non-additive GWAS method similar to that described in Reynolds *et al.* [11] to  
143 identify non-additive QTL for milk traits. This two-step method first uses a leave-one-segment-out  
144 (LOSO) approach to fit genomic marker effects to adjust for population structure, and a second-  
145 step Markov chain Monte Carlo (MCMC) method to test the effects of all imputed-to-sequence  
146 variants, one at a time. In general, for each sequence variant the method fits the following model:

$$y = 1\mu + Tb + M_{\alpha}\alpha + M_{\delta}\delta + e \quad 1$$

147

148 Where  $\mathbf{y}$  indicates a vector of one of the 5 phenotypes of interest, pre-adjusted as described in  
149 the '*Phenotypes*' section above,  $\mu$  is the overall mean,  $\mathbf{1}$  is a vector of ones,  $\mathbf{b}$  is a vector of  
150 genotype class effects for the sequence variant of interest, and  $\mathbf{T}$  is the design matrix relating  
151 records to genotype class for the sequence variant. The vector  $\alpha$  represents random SNP chip  
152 additive marker effects spanning the whole genome except the segment of interest such that  $\alpha \sim$   
153  $N(\mathbf{0}, I\sigma_{\alpha}^2)$ , where  $I$  is an identity matrix of order equal to the number of marker effects and  $\sigma_{\alpha}^2$   
154 represents the additive marker effect variance,  $\delta$  is a vector of random SNP chip dominance  
155 marker effects spanning the whole genome except the segment of interest such that  $\delta \sim N(\mathbf{0},$   
156  $I\sigma_{\delta}^2)$ , where  $\sigma_{\delta}^2$  represents the dominance marker effect variance.  $M_{\alpha}$  and  $M_{\delta}$  are matrices with  
157 each column representing the covariate values for a marker locus ([0, 1, 2] and [0, 1, 0],  
158 respectively). The vector  $\mathbf{e}$  represents residuals with  $\mathbf{e} \sim N(\mathbf{0}, \mathbf{R})$ , where for a simple model based  
159 on single observations  $\mathbf{R} = I\sigma_e^2$ , where  $I$  is an identity matrix of order equal to the number of  
160 phenotypic records and  $\sigma_e^2$  represents the residual error variance. Since the traits investigated  
161 here are represented by the mean of a variable number of repeated observations, the diagonal  
162 elements of  $\mathbf{R}$  varied according to the number of observations contributing to the yield deviation.  
163 One notable contrast to the model implemented in Reynolds *et al.*, is that in the current model, we  
164 fit both additive ( $M_{\alpha}$ ) and dominance ( $M_{\delta}$ ) effects of the genomic markers to adjust for population  
165 structure. This modification was made to better control the inflation observed when analysing milk  
166 traits in a population larger than that studied in Reynolds *et al.* [11].

167

168 Population structure adjustment

169 500 samples of vectors of plausible marker effects,  $\tilde{\alpha}$  and  $\tilde{\delta}$ , for the 31,451 SNP-chip markers,  
170 were generated using single-site Gibbs sampling from an extension of the BayesC0 algorithm  
171 implemented in GenSel using standard priors [24]. That algorithm was performed while omitting  
172 the **Tb** term from (1) and convergence of the Markov chain of plausible marker effects was  
173 determined using the Geweke diagnostic [25]. LOSO was used to avoid fitting SNP-chip marker  
174 effects in linkage disequilibrium with the sequence variant being tested. The genome was  
175 partitioned into 10Mbp LOSO intervals and, for each interval, phenotypes were adjusted for the  
176 samples of SNP chip marker effects except those within the relevant LOSO interval. This  
177 produced distinct LOSO-adjusted phenotypic deviations for each 10Mbp interval for each sample  
178 of plausible marker effects.

179

180 Association analysis

181 For each sequence variant, we sampled genotype class effects for each plausible sample of  
182 LOSO-adjusted phenotypic deviations. We obtained MCMC chains of additive and dominance  
183 genotypic effects, and standard-additive effects as contrasts of these plausible genotype class  
184 effects. These posterior distributions were summarised by their posterior means, posterior  
185 standard deviations, and z-statistics following a standard Normal distribution [26]. The statistical  
186 significance of standard-additive, additive, and dominance genetic effects were evaluated using a  
187 Z-test.

188

189 *QTL identification, significance criteria, and annotation*

190 We primarily aimed to detect non-additive QTL, as such we declared variants significant if the  
191 dominance genotypic effect, **d**, passed a false discovery rate (FDR) threshold of  $1 \times 10^{-3}$ . For each  
192 phenotype, this FDR threshold was calculated using q-values [27] as implemented in the *qvalue*  
193 package in R [28]. Since we were particularly interested in medium- to large-effect QTL, only loci  
194 with effect sizes (**a**, or **d**) greater than 5% the phenotypic standard deviation of the trait were



195 considered for further downstream analyses. We calculated the dominance coefficient  $k = \frac{d}{|a|}$  for  
196 each significant QTL to characterise the non-additive mechanism presented, where  $k \approx 0$   
197 represents a completely additive locus,  $k \approx 1$  represents a completely recessive locus,  $k < 1$  a  
198 partially dominant locus, and  $k > 1$  an over-dominant locus.  
199 For standard-additive effects,  $\alpha$ , we used GCTA-COJO [29] to detect tag variants for QTL  
200 identified in our standard-additive GWAS. GCTA-COJO utilises LD structure and GWAS  
201 summary statistics to iteratively identify significant QTL at the FDR threshold of  $1 \times 10^{-3}$ . We used  
202 sequence annotations from variant effect predictor (Ensembl 97, [30]) to highlight mutations that  
203 might be responsible for non-additive QTL identified, where the potential impact of missense  
204 mutations on protein function was judged using SIFT scores [31].

205

### 206 *Iterative GWAS*

207 We aimed to investigate whether multiple dominance QTL might segregate at associated loci, so  
208 implemented an iterative GWAS approach to differentiate QTL. Here, we first identified the  
209 variants on each chromosome that surpassed the false discovery threshold. We then adjusted the  
210 phenotype for the genotype class effects of the most significant variant (or candidate causal  
211 variant if identified) and then re-ran the GWAS model on the chromosome of interest using the  
212 residual phenotype. This process was iterated until there were no further significant QTL on the  
213 chromosome.

214

215

## 216 **Results**

### 217 *Heritabilities of lactation traits*

218 We first estimated additive and dominance heritabilities for each phenotype within each breed to  
219 investigate the additive and non-additive genetic architecture of each trait. These results are  
220 shown in Table 1, additive heritabilities far outweighed dominance heritabilities, though presented  
221 ratios of similar magnitude to those previously reported for other traits and populations [8,32]. Milk

222 fat yield in Jersey cows had the highest dominance heritability at 0.074, and milk protein  
223 percentage in Holstein-Friesian cows had the lowest dominance heritability at 0. Of note, a  
224 distinct contrast in relative heritabilities was apparent between milk composition and milk yield  
225 traits, where composition traits had high additive heritabilities but near zero dominance  
226 heritabilities, and yield traits presented lower additive heritabilities but higher dominance  
227 heritabilities (Table 1).  
228

| Trait                   | $h^2_{HF}$ | $\delta^2_{HF}$ | $h^2_J$ | $\delta^2_J$ |
|-------------------------|------------|-----------------|---------|--------------|
| Milk Volume             | 0.296      | 0.044           | 0.312   | 0.064        |
| Milk-Fat Yield          | 0.261      | 0.059           | 0.232   | 0.074        |
| Milk-Protein Yield      | 0.235      | 0.053           | 0.236   | 0.073        |
| Milk-Fat Percentage     | 0.7        | 0.006           | 0.616   | 0.015        |
| Milk-Protein Percentage | 0.642      | 0               | 0.636   | 0.005        |

$h^2$  - Additive heritability,  $\delta^2$  - dominance heritability, HF - Holstein-Friesian, J - Jersey

229

### 230 *Lactation trait GWAS*

231 We performed GWAS' across the five milk traits of interest, namely milk volume, milk protein  
232 yield, milk fat yield, milk protein percentage, and milk fat percentage to identify non-additive QTL  
233 (Figure 1). Both additive and dominance effects are included in these plots, where iterative  
234 analysis identified 23 dominance QTL signals that passed our FDR threshold. These included 10,  
235 11, 12, 8, and 7 QTL from 4,618, 2,706, 8,525, 8,987, and 5,800 significant variants across milk  
236 volume, milk protein yield, milk fat yield, milk protein percentage, and milk fat percentage,  
237 respectively. These signals spanned 13 discrete autosomes. In standard-additive GWAS,  
238 following iterative COJO analysis, we identified 217, 152, 142, 673, and 457 QTL across milk  
239 volume, milk protein yield, milk fat yield, milk protein percentage, and milk fat percentage,  
240 respectively.

241

### 242 *Dominance QTL*

243 We identified 15 significant dominance QTL for milk yield traits, and 11 for milk composition traits  
244 (Table 2, Supplementary Table 1). Across the milk yield dominance QTL, the majority (N=12)  
245 were recessive effects and they were located on chromosomes 2, 4, 5, 8, 12, 25, 28, and 29.  
246 Seven of these signals appear to be novel to the current study, the remainder having been  
247 recently highlighted in our analysis [11] of growth and developmental traits in an overlapping  
248 population to that described here. Across the 11 milk composition dominance QTL, the majority  
249 (N=8) presented partial dominance effects, with six of these representing loci identified from  
250 previously published additive GWAS (Supplementary Table 1).  
251 Figure 2a contrasts the minor allele frequency and effect size of dominance components for all of  
252 these effects. Interestingly, milk composition trait QTL appeared to be tagged by high minor allele  
253 frequency variants with comparatively small effect sizes, whereas milk yield QTL tag variants had  
254 low minor allele frequencies and larger effects. The type of effects also appeared to differ  
255 between traits (Figure 2b), where we noted an abundance of recessive QTL in milk yield traits,  
256 whereas milk composition traits mostly comprised partially dominant QTL.

Table 2 | Association statistics for candidate mutations at recessive loci

| QTL Position             | Chr8_44Mbp           | Chr25_24-26Mbp                                                                                                                 | Chr25_35Mbp       | Chr27_15Mbp       | Chr28_7Mbp        |
|--------------------------|----------------------|--------------------------------------------------------------------------------------------------------------------------------|-------------------|-------------------|-------------------|
| rsID                     | rs483207034          | rs453138457                                                                                                                    | rs471945767       | rs523126258       |                   |
| Candidate Gene           | <i>DOCK8</i>         | <i>IL4R</i>                                                                                                                    | <i>KIAA0556</i>   | <i>SLC25A4</i>    | <i>RBM34</i>      |
| VEP                      | Amino-acid sub.      | Amino-acid sub.                                                                                                                | Amino-acid sub.   | Amino-acid sub.   | Premature stop    |
| Protein Impact           | p.His649Leu          | p.Pro151Leu                                                                                                                    | p.Arg158His       | p.Thr197Met       | p.Arg55*          |
| SIFT                     | 0                    | 0.02                                                                                                                           | 0.14              | 0.01              |                   |
| MAF (HF / J / ALL)       | 0.013 / 0.059 / 0.03 | 0.001 / 0.043 / 0.0170.001 / 0.042 / 0.0160.002 / 0.049 / 0.0190.034 / 0.001 / 0.0310.046 / 0.001 / 0.0270.044 / 0.004 / 0.043 |                   |                   |                   |
| Phenotype                |                      |                                                                                                                                |                   |                   |                   |
| A ± SD                   | -129.181 ± 23.604    | -218.249 ± 39.988                                                                                                              | -279.656 ± 49.108 | -153.832 ± 25.598 | -106.454 ± 17.786 |
| P                        | 4.43E-08             | 4.82E-08                                                                                                                       | 1.24E-08          | 2.05E-10          | 2.16E-09          |
| D ± SD                   | 109.644 ± 23.905     | 215.668 ± 40.648                                                                                                               | 269.952 ± 49.887  | 97.084 ± 245.537  | 106.246 ± 17.929  |
| P                        | 4.51E-06             | 1.12E-07                                                                                                                       | 6.26E-08          | 7.60E-05          | 3.10E-09          |
| K                        | 0.849                | 0.988                                                                                                                          | 0.965             | 0.63              | 0.998             |
| Milk (L / Lactation)     |                      |                                                                                                                                |                   |                   |                   |
| A ± SD                   | -5.643 ± 1.177       | -11.827 ± 2.109                                                                                                                | -15.569 ± 2.359   | -6.849 ± 1.137    | -5.170 ± 0.866    |
| P                        | 1.66E-06             | 2.05E-08                                                                                                                       | 4.10E-11          | 1.71E-09          | 2.40E-09          |
| D ± SD                   | 5.110 ± 1.181        | 11.339 ± 2.087                                                                                                                 | 14.744 ± 2.372    | 4.412 ± 1.133     | 5.546 ± 0.859     |
| P                        | 1.51E-05             | 5.56E-08                                                                                                                       | 5.08E-10          | 9.82E-05          | 1.06E-10          |
| K                        | 0.906                | 0.959                                                                                                                          | 0.947             | 0.64              | 1.073             |
| Fat (kg / Lactation)     |                      |                                                                                                                                |                   |                   |                   |
| A ± SD                   | -4.981 ± 0.870       | -9.226 ± 1.616                                                                                                                 | -11.885 ± 1.834   | -5.498 ± 0.944    | -3.539 ± 0.587    |
| P                        | 1.05E-08             | 1.12E-08                                                                                                                       | 9.23E-11          | 5.49E-11          | 1.60E-09          |
| D ± SD                   | 4.308 ± 0.897        | 9.023 ± 1.631                                                                                                                  | 11.435 ± 1.829    | 4.067 ± 0.844     | 3.695 ± 0.592     |
| P                        | 1.56E-06             | 3.14E-08                                                                                                                       | 4.02E-10          | 1.43E-06          | 4.29E-10          |
| K                        | 0.865                | 0.978                                                                                                                          | 0.962             | 0.74              | 1.044             |
| Protein (kg / Lactation) |                      |                                                                                                                                |                   |                   |                   |
| A ± SD                   | -4.981 ± 0.870       | -9.226 ± 1.616                                                                                                                 | -11.885 ± 1.834   | -5.498 ± 0.944    | -3.539 ± 0.587    |
| P                        | 1.05E-08             | 1.12E-08                                                                                                                       | 9.23E-11          | 5.49E-11          | 1.60E-09          |
| D ± SD                   | 4.308 ± 0.897        | 9.023 ± 1.631                                                                                                                  | 11.435 ± 1.829    | 4.067 ± 0.844     | 3.695 ± 0.592     |
| P                        | 1.56E-06             | 3.14E-08                                                                                                                       | 4.02E-10          | 1.43E-06          | 4.29E-10          |
| K                        | 0.865                | 0.978                                                                                                                          | 0.962             | 0.74              | 1.044             |

A - genotypic additive effect, D - genotypic dominance effect, K - dominance coefficient

MAF - Minor Allele Frequency, HF - Holstein-Friesian, J - Jersey, ALL - all animals

Linkage values with top variants in Supplementary Table 1

258 *Candidate causal mutation identification*

259 Given the status of recessive milk yield QTL as potentially representing novel bovine disorders,  
260 we prioritised these QTL for further investigation, selecting QTL where the dominance coefficient  
261 ( $k$ ) was near 1 ( $0.7 < k < 1.3$ ). We used sequence annotations from variant effect predictor to  
262 highlight mutations that might be responsible for these effects (Ensembl 97, [30]), highlighting  
263 variants that were in strong to moderate LD ( $R^2 > 0.7$ ) with the lead variant per locus, and that  
264 were also predicted to alter or disrupt protein function. We identified 5 novel recessive QTL  
265 (including one biologically compelling near-significant recessive QTL), and several other  
266 recessive QTL previously identified and attributed to mutations in the *PLCD4*, *FGD4*, *MTRF1*,  
267 *GALNT2*, *DPF2*, and *MUS81* genes [11]. Figure 3 presents the position, regional LD, and  
268 association statistics for the QTL novel to the current study. Note that we have applied relatively  
269 simple annotation criteria and only highlight protein-coding variants as candidates since, for  
270 recessive signals at least, we consider protein altering mutations primary candidates given the  
271 loss of function connotation for these effects. Supplementary Table 1 shows all significant QTL  
272 identified, including those not expanded upon here.

273

274 *Chromosome 8*

275 Chromosome 8 presented a significant signal at 45Mbp for milk protein yield and milk fat yield.  
276 The most significant variants for these signals (g.45878531A>C and g.45880948C>T) were in  
277 strong LD ( $R^2=0.99$ ), and we note an annotated missense variant (g.44119667T>A,  
278 rs483207034) in high LD with both top-associated variants ( $R^2 = 0.85$  and  $0.85$ , respectively;  
279 Figure 3a). This variant in the *DOCK8* gene results in an amino acid (p.His649Leu) change and  
280 has a predicted deleterious impact (SIFT = 0).

281

282 *Chromosome 25*

283 A dispersed QTL signal is apparent on chromosome 25 at 24-27Mbp across the three lactation  
284 yield traits, with the top variants at g.25921991AT>T for milk fat yield, and g.27868969C>T for  
285 milk protein yield and milk volume. Effect prediction highlighted three candidate causal mutations

286 in the region. These included a p.Pro151Leu substitution in the *IL4R* gene (g.24904939C>T,  
287 rs453138457) with  $R^2 = 0.74$ , and 0.62, for the milk fat and milk protein/milk volume top variants,  
288 respectively, another missense variant (p.Arg158His) in the *KIAA0556* gene (g.25161613G>A,  
289 rs471945767) with  $R^2 = 0.89$ , and 0.74, respectively, and a nonsense variant (p.Trp731\*) in the  
290 *ITGAL* gene (g.26689392G>A, rs1116814780) with  $R^2 = 0.76$ , and 0.70, respectively (Figure 3b).  
291 While these are plausible candidates to explain the QTL, we were not able to distinguish between  
292 the candidates through iterative analysis, where fitting any one of these candidates removed the  
293 majority of the association at this locus.

294

295 A second signal for protein yield on chromosome 25 was observed at 35Mbp. This locus  
296 maintained its significance after accounting for the chromosome 25 25Mbp QTL through iterative  
297 analysis, suggesting it was a discrete effect. The locus presented a strong candidate causative  
298 mutation as potentially underlying the effect, comprising a stop gain mutation (g.35975573C>T;  
299 Arg123\*) in the *LRCH4* gene that was the third most highly associated variant at this locus overall  
300 (Figure 3c). We observed a mostly recessive effect for this variant ( $k = 0.74$ ), where animals  
301 carrying the heterozygote and homozygous alternate genotypes produce 1.44kg, and 11.21kg  
302 less milk protein per lactation compared to the homozygous reference genotype. When fitting  
303 g.35975573C>T as a fixed effect, the significance of the QTL is removed, and no further QTL are  
304 apparent on the chromosome (Supplementary Figure 1).

305

### 306 *Chromosome 27*

307 We observed a signal at 15Mbp on chromosome 27 for milk protein yield. Although this did not  
308 surpass our q-value FDR threshold of  $1 \times 10^{-3}$  (equivalent to  $P = 1.65 \times 10^{-7}$ ), this signal was  
309 conspicuous given that the lead variant (g.15491451C>T; rs523126258, p-value =  $1.30 \times 10^{-6}$ ) is a  
310 predicted deleterious missense mutation (p.Thr197Met) in the *SLC25A4* gene. Figure 3d shows a  
311 Manhattan plot for this region.

312

### 313 *Chromosome 28*

314 We previously reported a major recessive bodyweight QTL on Chromosome 28 represented by a  
315 likely causative splice acceptor mutation in *GALNT2* (g.2281801G>A) [11]. This QTL was  
316 apparent in the current analysis, impacting all three milk yield traits. However, the application of  
317 iterative association analysis revealed a secondary QTL approximately 4Mb downstream of the  
318 *GALNT2* mutation at Chr28:6-7Mbp (top variant at g.6223350G>A). This residual signal  
319 highlighted a stop-gain non-sense mutation (g.7922207G>A) strongly linked to the  
320 g.6223350G>A variant ( $R^2 = 0.89$ ; Figure 3e). This stop-gain mutation (p.Arg55\*) is in the *RBM34*  
321 gene, and appears to be in linkage equilibrium with the *GALNT2* causal mutation ( $R^2 < 0.001$ ),  
322 having little association with bodyweight in our previous analysis ( $p=0.37$ ; [11]). Upon the second  
323 chromosome 28 GWAS iteration (fitting both *GALNT2* and *RBM34* mutations as fixed effects),  
324 there were no further significant QTL on the chromosome (Supplementary Figure 2).

325

#### 326 *Dominance QTL for composition traits*

327 In addition to the recessive QTL identified for milk yield traits, we also identified dominance QTL  
328 for milk composition traits. We investigated these effects and observed several partial dominance  
329 QTL in close proximity to previously described additive loci. The tag variants of these QTL were  
330 adjacent the genes; *CSF2RB* [33], *MGST1* [16], *DGAT1* [12], *GHR* [13], *GPAT4* [15], and  
331 *PICALM* [34] and, in each case, these variants were in high linkage disequilibrium ( $R^2 > 0.8$ ) with  
332 previously identified causal and/or tag variants (Supplementary Table 1).

333

334 Milk protein percentage presented multiple dominance QTL on Chromosome 6 within the  
335 Chr6:80-85Mbp region (Supplementary Table 1). The most significant of these QTL presented the  
336 top variant g.84112451C>A and shows a partial dominance effect. Unlike the examples  
337 highlighted above, no very strongly linked candidate mutation was identified, though we note that  
338 this variant is in moderate LD with a previously proposed causative variant in *CSN1S1* ( $R^2 = 0.53$ ;  
339 p.Glu192Gly mutation; g.85427427A>G) [35]. Chromosome 12 presented a significant  
340 dominance QTL, where we observed a partial dominance effect at 68Mbp for milk protein  
341 percentage with the top variant at g.68763031T>TG. As with the chromosome 6 locus, no

342 particularly obvious candidate causal variant or gene was identified that might account for this  
343 signal.

344

#### 345 *Contrasting additive and dominance GWAS results*

346 Figure 4 compares minor allele frequency (MAF) and the effect sizes between homozygous  
347 genotypes across all traits and genetic mechanisms. As might be expected, we observed many  
348 more additive QTL than dominance QTL across all traits. Notably however, mutations detected  
349 via dominance GWAS in milk yield traits presented very large effects compared to the additive  
350 QTL detected for these traits, and most presented a recessive mechanism. On the other hand,  
351 the largest effects presented for the two milk composition traits were mostly additive QTL, where  
352 dominance effects tended to be higher MAF and incompletely dominant in their presentation of  
353 effect.

354

355

## 356 **Discussion**

357 The results in this study highlight the presence of many non-additive QTL for milk traits in cattle.  
358 The majority of these signals for milk yield traits present recessive QTL, identifying five novel loci  
359 and several previously described recessive QTL [11]. Although milk protein percentage and milk  
360 fat percentage traits also yielded many dominance GWAS signals, most presented partially  
361 dominant QTL that appeared to represent minor dominance components to previously reported  
362 additive QTL.

363

#### 364 *Different trait classes present contrasting additive and non-additive genetic architectures*

365 One remarkable observation from the current study is the apparent difference in additive and non-  
366 additive genetic architectures between milk yield traits and milk composition traits. Dominance  
367 heritabilities of yield traits ranged from 3% to 7%, whereas composition traits have dominance  
368 heritabilities at or near zero. By contrast, additive heritabilities ranged from 23% to 31% for yield



369 traits, compared to composition traits which ranged from 64% to 70%. These findings are  
370 consistent with Sun *et al.* [8] where they observed similar additive and dominance heritabilities  
371 and suggest dominance, in particular recessive mechanisms, may play a bigger role in the  
372 regulation of yield traits than composition traits.

373

374 These architecture contrasts were also apparent when comparing the properties of individual  
375 dominance QTL between milk yield and milk composition traits. Dominance QTL identified in milk  
376 yield traits manifested primarily with recessive genetic mechanisms, while milk composition traits  
377 presented primarily partial dominance effects. Of further note, milk yield trait dominance QTL  
378 typically had low minor allele frequencies and large effect sizes, whereas dominance QTL for milk  
379 composition traits were typically characterised by high minor allele frequencies and smaller effect  
380 sizes. We theorise that these observations may be due to the way in which the different traits are  
381 able to reflect underlying deleterious recessive syndromes – i.e., their utility to serve as proxies of  
382 genetic disorders. Of all recessive QTL detected in the current study, we previously validated a  
383 subset of these as representing new genetic disorders [11]. Although we did not investigate the  
384 novel recessive loci in this study with the same rigour as those investigated in Reynolds *et al.*,  
385 their very large, uniformly negative effects suggest some at least will similarly validate as new  
386 recessive syndromes. Notably, none of these loci (new or old) show substantial effects on milk  
387 composition, suggesting milk fat and protein percentage traits do not readily reflect recessive  
388 effects. This finding can be rationalised by the comparatively broad range of biological processes  
389 reflected by milk yield traits (or the growth and development traits investigated in Reynolds *et al.*  
390 2021), where the energy demands of lactation (or growth) might be expected to manifest a wide  
391 range of other organismal stresses. The relative composition of milk components, by contrast,  
392 likely represents a narrower spectrum of mammary-specific biology that we hypothesise is less  
393 able to serve as a proxy of animal fitness.

394

395 It should be acknowledged that given protein yield and fat yield are the products of milk volume  
396 and their respective percentages, these traits are not independent. We observe the variance

397 components and genetic architectures of milk fat yield and milk protein yield are more  
398 comparable to milk volume than their respective composition traits. This suggests milk volume  
399 has a greater influence on milk fat yield and milk protein yield due to the additional environmental  
400 factors and measurement errors affecting milk volume.

401

402 *Previous studies highlighting recessive effects on quantitative traits*

403 As discussed above, we recently reported an investigation of growth and developmental traits  
404 that identified non-additive QTL using similar approaches to those presented here [11]. That  
405 study demonstrated how quantitative traits can be used as proxies to map genetic disorders  
406 without prior disease identification. In doing so, using sequence-resolution variants, the research  
407 highlighted several recessive QTL represented by variants in the *PLCD4*, *FGD4*, *MTRF1*,  
408 *GALNT2*, *DPF2*, and *MUS81* genes, each with large effects on bodyweight and other quantitative  
409 traits. The work presented here builds on those findings; we identified many of the same  
410 recessive mutations as well as several additional recessive QTL. The additional discoveries made  
411 here can be assumed to reflect the increased sample size leveraged in the current study.

412

413 Aside from the Reynolds *et al.* study discussed above, few other studies have highlighted major  
414 effect recessive impacts using quantitative trait data. Although non-additive GWAS with large  
415 sample sizes has been performed in cattle [10,32], low marker densities in these earlier studies  
416 may have hampered the ability to directly resolve candidate causative variants [11]. This  
417 challenge arises due to the different linkage disequilibrium (LD) properties between causal and  
418 observed variants for additive and non-additive QTL, where LD of an observed marker tagging a  
419 causal variant will manifest at  $R^2$  for an additive effect, compared to  $R^4$  for a recessive signal.  
420 This means observed tag variants need to be more closely linked to causal dominance variants to  
421 capture the QTL [36,37]. Despite limited prior literature on the use of non-additive GWAS to this  
422 end, one noteworthy study suggesting the importance of recessive variants to animal breeding  
423 traits was recently reported in the context of male fertility and semen traits in cattle [38]. Here, the  
424 researchers identified recessive QTL and candidate causal mutations in several genes including

425 a missense variant in *SPATA16*. That study used imputed genotypes at high density (based on  
426 the Illumina BovineHD platform), though it is noteworthy that the study population used was quite  
427 small (N=3,736 bulls). It seems likely that the discovery of these QTL was aided in part by the  
428 remarkable frequency of the deleterious haplotypes identified in that study, presenting allele  
429 frequencies ranging from 9-34% [38].

430

#### 431 *Recessive QTL of interest*

432 Although many non-additive signals were identified in this study, we were particularly interested in  
433 recessive QTL with large effects, given that these might represent underlying genetic disorders.  
434 The five novel recessive QTL on chromosomes 8, 25, 27, and 28 are presented and discussed  
435 below.

436

#### 437 *Chromosome 8 - DOCK8*

438 Our results present a missense mutation in the *DOCK8* gene as potentially having a deleterious  
439 recessive impact on milk yield traits. The QTL appears to operate in a completely recessive  
440 manner, with the *DOCK8* variant present at low allele frequencies in each breed (Holstein-  
441 Friesian MAF = 0.013, Jersey MAF = 0.059). *DOCK8*, dedicator of cytokinesis 8, is involved with  
442 guanine nucleotide exchange factors and influences intracellular signalling networks, and is  
443 important in immune responses and lymphocyte regulation in humans and mice [39]. Recessive  
444 mutations in *DOCK8* have been associated with hyper Immunoglobulin E syndrome leading to the  
445 onset of combined immunodeficiency disease and other health complications [40]. In mice,  
446 compromised immune responses are also observed including negative impacts on B cell  
447 migration [41], and T cell migration and viability [42,43]. *DOCK8* variants have not previously  
448 been associated with cattle performance traits, though if this missense mutation underlies the  
449 chromosome 8 QTL, it could be presumed to act through similar negative impacts on the immune  
450 system. Under this hypothesis, it is unknown whether the lactation effects are due to mammary  
451 immune function or secondary impacts, though given that higher levels of circulating  
452 immunoglobulin E and lymphocyte profiling can indicate *DOCK8* deficiency in humans [40,44],

453 future work to sample and profile homozygous animals could be used to definitively establish the  
454 causality of the *DOCK8* missense mutation for this QTL.

455

#### 456 *Chromosome 25 - IL4R, KIAA0556, ITGAL*

457 The QTL identified on chromosome 25 at 24-27Mbp presented three candidate mutations in  
458 genes: *IL4R*, *KIAA0556*, and *ITGAL*. *IL4R*, Interleukin 4 receptor, is a transmembrane protein  
459 involved in immune responses in humans [45]. *KIAA0556* is associated with microtubule  
460 regulation in humans, and knockout mutations in humans and mice have been associated with  
461 the neurological disorder, Joubert syndrome [46]. *ITGAL* encodes integrin alpha L chain, and loss  
462 of function variants in this gene have been associated with compromised immunity including  
463 increased susceptibility to infection to *Salmonella* in mice [47]. Given that iterative association  
464 analysis failed to prioritise one of these variants over the other, it is unknown which of these  
465 variants might be responsible for the QTL, and our focus on protein-coding variants as candidates  
466 may have also overlooked alternative non-coding or structural mutations as responsible. These  
467 variants are nevertheless in moderately strong, though not perfect LD (max. pairwise  $R^2= 0.79$ ),  
468 so physical genotyping for fine mapping and future functional testing should help to resolve the  
469 identity of the gene (or genes) underpinning this QTL.

470

#### 471 *Chromosome 25 - LRCH4*

472 Although iterative GWAS did not resolve candidates in the above example, this approach did  
473 highlight a second QTL on chromosome 25 represented by a nonsense mutation in the *LRCH4*  
474 gene. *LRCH4*, leucine-rich repeats and calponin homology containing protein 4, regulates the  
475 signalling of toll-like receptors (TLRs) and has been shown to influence innate immune responses  
476 in mice [48]. In that study, researchers showed *LRCH4*-silenced cells presented reduced  
477 expression across pro-inflammatory cytokines produced in the TLR4 pathway, most notably that  
478 of IL-10 and MCP-1. This suggests a knockout mutation, like that observed here, may have  
479 negative impacts on innate immunity in cattle that may drive negative impacts on milk volume,  
480 milk fat yield, and milk protein yield.

481

482 *Chromosome 27 - SLC25A4*

483 While non-significant at the genome-wide level (c.f.  $P = 1.65 \times 10^{-7}$  vs  $P = 1.30 \times 10^{-6}$ ), the  
484 chromosome 27 15.5Mbp locus presented a conserved amino acid mutation in *SLC25A4* as the  
485 lead associated variant and was therefore of note. This variant demonstrated a complete  
486 recessive effect on all three lactation yield traits. The *SLC25A4* gene, solute carrier family 25  
487 member 4, encodes the Adenine nucleotide translocator (Ant1) protein, responsible for the  
488 translocation of ATP and ADP between the cytoplasm and mitochondria. In mice, knockouts of  
489 *SLC25A4* result in mitochondrial myopathy and cardiomyopathy, and a severe intolerance to  
490 exercise [49]. Similarly, in humans, childhood-onset mitochondrial disease and exercise  
491 intolerance have been observed for both dominant [50] and recessive mutations [51] in *SLC25A4*.  
492 If future association studies confirm the non-significant associations highlighted in the current  
493 study, it would be intriguing to examine the phenotypes of homozygous cows further, given the  
494 implication that mitochondrial functional deficits and exercise intolerance might underlie these  
495 lactation performance impacts.

496

497 *Chromosome 28 - RBM34*

498 On first appearance, the strong associations with lactation yield traits near the beginning of  
499 chromosome 28 might reasonably be attributed to the *GALNT2* splice site mutation reported and  
500 investigated previously [11]. However, upon fitting this mutation as a covariate in our iterative  
501 GWAS approach, a secondary peak was still strongly apparent, highlighting a nonsense mutation  
502 in the *RBM34* gene as potentially responsible for the effect. The *RBM34* gene encodes an RNA  
503 recognition motif protein with an RNA-binding domain. There appears to be little previous  
504 research in humans or model organisms on *RBM34*, with limited recent literature probing its  
505 involvement in embryonic stem cell differentiation [52]. Here we observed a predicted  
506 homozygous knockout of the gene that may influence milk volume, milk protein yield, and milk fat  
507 yield in a recessive manner, though its status as a largely uncharacterised RNA-binding protein  
508 leaves little room for speculation as to how those effects might manifest. Mechanism aside,

509 identification of two uncorrelated recessive QTL demonstrates the utility of using iterative GWAS  
510 approaches, given that ‘peaks’ with compelling causative mutations presented by previous  
511 analyses might otherwise go un-investigated. Of further note at this locus, other researchers  
512 appear to have observed lactation effects at the 6-10Mb locus previously [53]. However, there  
513 appears to be very low LD ( $R^2$  with RBM34 = 0.04, GALNT2 = 0.02) between the tag variant  
514 identified by Raven *et al.* (rs41607517) and the nonsense mutations identified here, suggesting  
515 these are likely different effects.

516

### 517 *Previously described additive QTL present partial dominance*

518 We observed several partial dominance QTL closely linked to previously described QTL identified  
519 from standard-additive analyses. As described in Supplementary Table 1, we identified  
520 dominance components in high LD with variants associated with the genes; *CSF2RB* [33],  
521 *MGST1* [16], *DGAT1* [12], *GHR* [13], *AGPAT6* [15], *PLAG1* [54,55], and *PICALM* [34] (and in  
522 moderate LD with a *CSN1S1* variant [35]). These partial dominance associations were mostly  
523 identified in percentage traits. These observations suggest that many well-known major-effect  
524 QTL identified from additive analyses incorporate some level of non-additivity, in agreement with  
525 the analyses of milk traits reported by Jiang *et al.* (2017;2019) [10,32].

526

## 527 **Conclusion**

528 In this study, we have highlighted that different classes of lactation traits (yield compared to  
529 composition traits) present differing additive and non-additive genetic architectures. We  
530 speculate, that these differences derive from underlying contrasts in the cellular and molecular  
531 representation of these traits, where despite comparatively low additive heritabilities, lactation  
532 yield effects may better reflect whole-animal energy and fitness status and be a better proxy of a  
533 wider range of underlying biological disorders. At a single locus level, we identified five QTL  
534 presenting seven candidate causative variants in the *DOCK8*, *IL4R*, *KIAA0556*, *ITGAL*, *LRCH4*,  
535 *SLC25A4*, and *RBM34* genes, highlighting medium to large effect recessive variants that may  
536 provide future opportunity for diagnostic testing and animal improvement.

537 **Figure Legends**

538 **Figure 1 – Dominance and additive Manhattan plots for lactation traits.**

539 a-e, Manhattan plots for milk volume (a), milk protein yield (b), milk fat yield (c), milk protein  
540 percentage (d), and milk fat percentage (e) showing significance of genotypic dominance (blue  
541 and light blue), and additive (grey and light grey) estimates for ~16.6 million imputed sequence  
542 variants. Chromosomes are differentiated by alternating colours and a grey line indicates the  
543 false discovery rate of  $1 \times 10^{-3}$ , used to account for multiple testing. The y-axes are truncated for  
544 display purposes (indicated by 3 dots).

545 **Figure 2**

546 Plots presenting genetic architecture of significant dominance QTL from GWAS on milk volume  
547 (milk), milk protein yield (prot), milk fat yield (fat), milk protein percentage (protper), milk fat  
548 percentage (fatper), and. The plots contrast the minor allele frequency (MAF) against the  
549 dominance effect size (a), and the absolute value of k, where  $k = d/|a|$  against the dominance  
550 effect size (b).

551 **Figure 3**

552 Manhattan plots for the five novel milk protein yield QTL representing the chr8:44Mbp (a),  
553 chr25:24-27Mbp (b), chr25:35Mbp (c), chr27:15Mbp (d), and chr28:7Mbp (e) loci. Variants are  
554 coloured by LD ( $R^2$ ) values with the top tag variant per locus, protein coding variants are shown  
555 as outlined triangles. Gene tracks are presented below each plot based on Ensembl 97, where  
556 gene names have been filtered on size.

557 **Figure 4**

558 Plots contrasting minor allele frequency (MAF) and the absolute effect size between homozygote  
559 genotype classes (Effect size) for additive (blue) and dominance (red) QTL detected via GWAS  
560 across lactation traits.

561

562

563

564

565 **Supplementary Figure Legends**

566 **Supplementary Figure 1**

567 Iterative Manhattan plots for milk-protein yield on chromosome 25. Blue indicates the candidate  
568 causal variants in genes; *IL4R*, *KIAA0556*, and *ITGAL*, and red indicates the candidate causal  
569 variant in the *LRCH4* gene. A grey line indicates the false discovery rate of  $1 \times 10^{-3}$ , used to  
570 account for multiple testing.

571 **Supplementary Figure 2**

572 Iterative Manhattan plots for milk-protein yield on chromosome 28. Blue indicates the candidate  
573 causal variant in the *GALNT2* gene, and red indicates the candidate causal variant in the *RBM34*  
574 gene. A grey line indicates the false discovery rate of  $1 \times 10^{-3}$ , used to account for multiple testing.

575

576

577

578

579

580

581

582

583

584

585

586

587

588

589

590

591

592



593 **References**

- 594 1. Charlier C, Agerholm JS, Coppieters W, Karlskov-Mortensen P, Li W, de Jong G, et al. A  
595 Deletion in the Bovine FANCI Gene Compromises Fertility by Causing Fetal Death and  
596 Brachyspina. Veitia RA, editor. PLoS One. Public Library of Science; 2012;7:e43085.
- 597 2. Littlejohn MD, Henty KM, Tiplady K, Johnson T, Harland C, Lopdell T, et al. Functionally  
598 reciprocal mutations of the prolactin signalling pathway define hairy and slick cattle. Nat  
599 Commun. Nature Publishing Group; 2014;5:1–8.
- 600 3. Bourneuf E, Otz P, Pausch H, Jagannathan V, Michot P, Grohs C, et al. Rapid Discovery of de  
601 Novo Deleterious Mutations in Cattle Enhances the Value of Livestock as Model Species. Sci  
602 Rep. Nature Publishing Group; 2017;7:1–19.
- 603 4. Charlier C, Li W, Harland C, Littlejohn M, Coppieters W, Creagh F, et al. NGS-based reverse  
604 genetic screen for common embryonic lethal mutations compromising fertility in livestock.  
605 Genome Res. Cold Spring Harbor Laboratory Press; 2016;26:1333–41.
- 606 5. Michot P, Chahory S, Marete A, Grohs C, Dagios D, Donzel E, et al. A reverse genetic  
607 approach identifies an ancestral frameshift mutation in RP1 causing recessive progressive retinal  
608 degeneration in European cattle breeds. Genet Sel Evol. BioMed Central Ltd.; 2016;48:1–15.
- 609 6. Zhu Z, Bakshi A, Vinkhuyzen AAE, Hemani G, Lee SH, Nolte IM, et al. Dominance genetic  
610 variation contributes little to the missing heritability for human complex traits. Am J Hum Genet.  
611 Cell Press; 2015;96:377–85.
- 612 7. Bolormaa S, Pryce JE, Zhang Y, Reverter A, Barendse W, Hayes BJ, et al. Non-additive  
613 genetic variation in growth, carcass and fertility traits of beef cattle. BioMed Central; 2015;47.
- 614 8. Sun C, VanRaden PM, Cole JB, O'Connell JR. Improvement of prediction ability for genomic  
615 selection of dairy cattle by including dominance effects. Barendse W, editor. PLoS One. Public  
616 Library of Science; 2014;9:e103934.
- 617 9. Aliloo H, Pryce JE, González-Recio O, Cocks BG, Hayes BJ. Accounting for dominance to  
618 improve genomic evaluations of dairy cows for fertility and milk production traits. Genet Sel Evol.  
619 BioMed Central Ltd.; 2016;48:1–11.
- 620 10. Jiang J, Ma L, Prakapenka D, VanRaden PM, Cole JB, Da Y. A Large-Scale Genome-Wide

- 621 Association Study in U.S. Holstein Cattle. *Front Genet. Frontiers Media S.A.*; 2019;10:412.
- 622 11. Reynolds EGM, Neeley C, Lopdell TJ, Keehan M, Dittmer K, Harland CS, et al. Non-additive  
623 association analysis using proxy phenotypes identifies novel cattle syndromes. *Nat Genet. Nature*  
624 *Publishing Group*; 2021;1–6.
- 625 12. Grisart B, Coppieters W, Farnir F, Karim L, Ford C, Berzi P, et al. Positional candidate cloning  
626 of a QTL in dairy cattle: Identification of a missense mutation in the bovine DGAT1 gene with  
627 major effect on milk yield and composition. *Genome Res. Cold Spring Harbor Laboratory Press*;  
628 2002;12:222–31.
- 629 13. Blott S, Kim JJ, Moisisio S, Schmidt-Küntzel A, Cornet A, Berzi P, et al. Molecular dissection of  
630 a quantitative trait locus: A phenylalanine-to-tyrosine substitution in the transmembrane domain of  
631 the bovine growth hormone receptor is associated with a major effect on milk yield and  
632 composition. *Genetics*. 2003;163:253–66.
- 633 14. Cohen-Zinder M, Seroussi E, Larkin DM, Looor JJ, Everts-Van Der Wind A, Lee JH, et al.  
634 Identification of a missense mutation in the bovine ABCG2 gene with a major effect on the QTL  
635 on chromosome 6 affecting milk yield and composition in Holstein cattle. *Genome Res. Cold*  
636 *Spring Harbor Laboratory Press*; 2005;15:936–44.
- 637 15. Littlejohn MD, Tiplady K, Lopdell T, Law TA, Scott A, Harland C, et al. Expression variants of  
638 the lipogenic AGPAT6 gene affect diverse milk composition phenotypes in *Bos taurus*. *PLoS*  
639 *One. Public Library of Science*; 2014;9:85757.
- 640 16. Littlejohn MD, Tiplady K, Fink TA, Lehnert K, Lopdell T, Johnson T, et al. Sequence-based  
641 Association Analysis Reveals an MGST1 eQTL with Pleiotropic Effects on Bovine Milk  
642 Composition. *Sci Rep. Nature Publishing Group*; 2016;6:1–14.
- 643 17. Bauman DE, Bruce Currie W. Partitioning of Nutrients During Pregnancy and Lactation: A  
644 Review of Mechanisms Involving Homeostasis and Homeorhesis. *J Dairy Sci. Elsevier*;  
645 1980;63:1514–29.
- 646 18. Garrick DJ, Taylor JF, Fernando RL. Deregressing estimated breeding values and weighting  
647 information for genomic regression analyses. *Genet Sel Evol. BioMed Central*; 2009;41:55.
- 648 19. Li H. Aligning sequence reads, clone sequences and assembly contigs with BWA-MEM.

- 649 2013;
- 650 20. Depristo MA, Banks E, Poplin R, Garimella K V., Maguire JR, Hartl C, et al. A framework for  
651 variation discovery and genotyping using next-generation DNA sequencing data. *Nat Genet.*  
652 2011;43:491–501.
- 653 21. Browning BL, Zhou Y, Browning SR. A One-Penny Imputed Genome from Next-Generation  
654 Reference Panels. *Am J Hum Genet. Cell Press*; 2018;103:338–48.
- 655 22. Wang Y, Tiplady K, Johnson TJJ, Harland C, Keehan M, Reynolds E, et al. Evaluating the  
656 accuracy of imputed whole-genome sequence data in admixed dairy cattle. *Int Conf Quant Genet*  
657 6. 2020.
- 658 23. Yang J, Lee SH, Goddard ME, Visscher PM. GCTA: A tool for genome-wide complex trait  
659 analysis. *Am J Hum Genet. The American Society of Human Genetics*; 2011;88:76–82.
- 660 24. Fernando RL, Garrick D. *Genome-Wide Association Studies and Genomic Prediction*. 2013.
- 661 25. Geweke J. Evaluating the Accuracy of Sampling-Based Approaches to the Calculation of  
662 Posterior Moments. *Bayesian Stat.* 1991.
- 663 26. Bernal Rubio YL, Gualdrón Duarte JL, Bates RO, Ernst CW, Nonneman D, Rohrer GA, et al.  
664 Meta-analysis of genome-wide association from genomic prediction models. *Anim Genet. John*  
665 *Wiley & Sons, Ltd (10.1111)*; 2015;47:36–48.
- 666 27. Storey JD, Tibshirani R. Statistical significance for genomewide studies. *Proc Natl Acad Sci U*  
667 *S A.* 2003;100:9440–5.
- 668 28. Storey JD, Bass AJ, Dabney A, Robinson D. qvalue: Q-value estimation for false discovery  
669 rate control. 2020.
- 670 29. Yang J, Ferreira T, Morris AP, Medland SE, Madden PAF, Heath AC, et al. Conditional and  
671 joint multiple-SNP analysis of GWAS summary statistics identifies additional variants influencing  
672 complex traits. *Nat Genet. Nature Publishing Group*; 2012;44:369–75.
- 673 30. McLaren W, Gil L, Hunt SE, Riat HS, Ritchie GRS, Thormann A, et al. The Ensembl Variant  
674 Effect Predictor. *Genome Biol. BioMed Central Ltd.*; 2016;17:1–14.
- 675 31. Ng PC, Henikoff S. SIFT: Predicting amino acid changes that affect protein function. *Nucleic*  
676 *Acids Res. Oxford Academic*; 2003;31:3812–4.

- 677 32. Jiang J, Shen B, O'Connell JR, VanRaden PM, Cole JB, Ma L. Dissection of additive,  
678 dominance, and imprinting effects for production and reproduction traits in Holstein cattle. *BMC*  
679 *Genomics*. BioMed Central Ltd.; 2017;18:1–13.
- 680 33. Lopdell TJ, Tiplady K, Couldrey C, Johnson TJJ, Keehan M, Davis SR, et al. Multiple QTL  
681 underlie milk phenotypes at the CSF2RB locus. *Genet Sel Evol*. BioMed Central; 2019;51:1–16.
- 682 34. Lopdell TJ, Tiplady K, Struchalin M, Johnson TJJ, Keehan M, Sherlock R, et al. DNA and  
683 RNA-sequence based GWAS highlights membrane-transport genes as key modulators of milk  
684 lactose content. *BMC Genomics*. BioMed Central; 2017;18:968.
- 685 35. Caroli AM, Chessa S, Erhardt GJ. Invited review: Milk protein polymorphisms in cattle: Effect  
686 on animal breeding and human nutrition. *J Dairy Sci*. Elsevier; 2009;92:5335–52.
- 687 36. Wei WH, Hemani G, Haley CS. Detecting epistasis in human complex traits. *Nat. Rev. Genet*.  
688 Nature Publishing Group; 2014. p. 722–33.
- 689 37. Visscher PM, Wray NR, Zhang Q, Sklar P, McCarthy MI, Brown MA, et al. 10 Years of GWAS  
690 Discovery: Biology, Function, and Translation. *Cell Press*; Jul 6, 2017 p. 5–22.
- 691 38. Hiltbold M, Kadri NK, Janett F, Witschi U, Schmitz-Hsu F, Pausch H. Autosomal recessive loci  
692 contribute significantly to quantitative variation of male fertility in a dairy cattle population. *BMC*  
693 *Genomics* 2021 221. BioMed Central; 2021;22:1–19.
- 694 39. Kearney CJ, Randall KL, Oliaro J. DOCK8 regulates signal transduction events to control  
695 immunity. *Cell Mol Immunol*. Nature Publishing Group; 2017;14:406–11.
- 696 40. Engelhardt KR, Mcghee S, Winkler S, Sassi A, Woellner C, Lopez-herrera G, et al. Large  
697 deletions and point mutations involving DOCK8 in the autosomal recessive form of the hyper-IgE  
698 syndrome. *J Allergy*. 2009;124:1289.
- 699 41. Randall KL, Lambe T, Johnson AL, Treanor B, Kucharska E, Domaschitz H, et al. Dock8  
700 mutations cripple B cell immunological synapses, germinal centers and long-lived antibody  
701 production. 2009;
- 702 42. Lambe T, Crawford G, Johnson AL, Crockford TL, Bouriez-Jones T, Smyth AM, et al. DOCK8  
703 is essential for T-cell survival and the maintenance of CD8 + T-cell memory. *Eur J Immunol*. John  
704 Wiley & Sons, Ltd; 2011;41:3423–35.

- 705 43. Zhang Q, Dove CG, Hor JL, Murdock HM, Strauss-Albee DM, Garcia JA, et al. DOCK8  
706 regulates lymphocyte shape integrity for skin antiviral immunity. *J Exp Med*. Rockefeller  
707 University Press; 2014;211:2549–66.
- 708 44. Janssen E, Tsitsikov E, Al-Herz W, Lefranc G, Megarbane A, Dasouki M, et al. Flow  
709 cytometry biomarkers distinguish DOCK8 deficiency from severe atopic dermatitis. *Clin Immunol*.  
710 Academic Press Inc.; 2014;150:220–4.
- 711 45. Shirakawa T, Deichmann KA, Izuhara K, Mao XQ, Adra CN, Hopkin JM. Atopy and asthma:  
712 Genetic variants of IL-4 and IL-13 signalling. *Immunol. Today*. Elsevier Ltd; 2000. p. 60–4.
- 713 46. Sanders AAWM, de Vrieze E, Alazami AM, Alzahrani F, Malarkey EB, Sorusch N, et al.  
714 KIAA0556 is a novel ciliary basal body component mutated in Joubert syndrome. *Genome Biol*.  
715 BioMed Central Ltd.; 2015;16:1–23.
- 716 47. Zhang J, Teh M, Kim J, Eva M, Cayrol R, Meade R, et al. A loss-of-function mutation in Itgal  
717 contributes to the high susceptibility of Collaborative Cross strain CC042 to Salmonella infections.  
718 bioRxiv. Cold Spring Harbor Laboratory; 2019;723478.
- 719 48. Aloor JJ, Azzam KM, Guardiola JJ, Gowdy KM, Madenspacher JH, Gabor KA, et al. Leucine-  
720 rich repeats and calponin homology containing 4 (Lrch4) regulates the innate immune response.  
721 *J Biol Chem*. American Society for Biochemistry and Molecular Biology Inc.; 2019;294:1997–  
722 2008.
- 723 49. Graham BH, Waymire KG, Cottrell B, Trounce IA, MacGregor GR, Wallace DC. A mouse  
724 model for mitochondrial myopathy and cardiomyopathy resulting from a deficiency in the  
725 heart/muscle isoform of the adenine nucleotide translocator. *Nat Genet*. Nature Publishing Group;  
726 1997;16:226–34.
- 727 50. Kaukonen J, Juselius JK, Tiranti V, Kyttala A, Zeviani M, Comi GP, et al. Role of adenine  
728 nucleotide translocator 1 in mtDNA maintenance. *Science (80- )*. American Association for the  
729 Advancement of Science; 2000;289:782–5.
- 730 51. Palmieri L, Alberio S, Pisano I, Lodi T, Meznaric-Petrusa M, Zidar J, et al. Complete loss-of-  
731 function of the heart/muscle-specific adenine nucleotide translocator is associated with  
732 mitochondrial myopathy and cardiomyopathy. *Hum Mol Genet*. Oxford Academic; 2005;14:3079–

733 88.

734 52. Wang X, Ping C, Tan P, Sun C, Liu G, Liu T, et al. hnRNPLL controls pluripotency exit of  
735 embryonic stem cells by modulating alternative splicing of Tbx3 and Bptf . EMBO J. EMBO;  
736 2021;40:e104729.

737 53. Raven LA, Cocks BG, Kemper KE, Chamberlain AJ, Vander Jagt CJ, Goddard ME, et al.  
738 Targeted imputation of sequence variants and gene expression profiling identifies twelve  
739 candidate genes associated with lactation volume, composition and calving interval in dairy cattle.  
740 Mamm Genome. Springer US; 2016;27:81–97.

741 54. Karim L, Takeda H, Lin L, Druet T, Arias J a C, Baurain D, et al. Variants modulating the  
742 expression of a chromosome domain encompassing PLAG1 influence bovine stature. Nat Genet.  
743 2011;43:405–13.

744 55. Fink T, Tiplady K, Lopdell T, Johnson T, Snell RG, Spelman RJ, et al. Functional confirmation  
745 of PLAG1 as the candidate causative gene underlying major pleiotropic effects on body weight  
746 and milk characteristics. Sci Rep. Nature Publishing Group; 2017;7:1–8.

747 56. PRJNA656361 Cattle whole genome sequences [Internet]. 2021. Available from:  
748 <https://www.ncbi.nlm.nih.gov/bioproject/PRJNA656361>  
749  
750  
751  
752  
753  
754  
755  
756  
757  
758  
759  
760

761 **Declarations**

762 **Availability of data and materials**

763 A subset of whole-genome sequences used for imputation of the genotypes presented in this  
764 paper have been deposited in the SRA database [56]. Additional data is available on reasonable  
765 request with the permission of Livestock Improvement Corporation, contingent on the execution  
766 of an appropriate transfer agreement.

767 **Acknowledgements**

768 We are grateful for the use of New Zealand eScience Infrastructure (NeSI) high-performance  
769 computing facilities as part of this research. We are additionally grateful to the funders of this  
770 research.

771 **Funding**

772 The research was financially supported by the Ministry of Business, Innovation and Employment  
773 (MBIE; Wellington, New Zealand) and the Ministry of Primary Industries (MPI; Wellington, New  
774 Zealand), who independently co-funded the work through the Endeavour Fund (LICX1802) and  
775 (now historical) Primary Growth Partnership research programs, respectively. EGMR is supported  
776 by a MPI Postgraduate Scholarship (Wellington, New Zealand) and an AI Rae Centre scholarship  
777 (Hamilton, New Zealand). External funders had no role in the analysis or interpretation of the  
778 data, or in writing the manuscript.

779 **Author's Contributions**

780 EGMR, DJG, and MDL conceived and designed the experiments. EGMR, TL, KT, YW, CSH,  
781 BLH, DJG, and MDL performed or assisted statistical analysis. EGMR, TL, KT, YW, CSH, TJJJ,  
782 CN, KC, RGS, CC, SRD, BLH, RJS, DJG, and MDL contributed materials or analysis tools.  
783 EGMR, DJG, and MDL interpreted results. BLH, RJS, DJG, and MDL were involved in  
784 supervising the project. EGMR, DJG, and MDL wrote and revised the manuscript. All authors  
785 have read and approved the final manuscript.

786 **Ethics Declaration**

787 All animal experiments were conducted in strict accordance with the rules and guidelines outlined  
788 in the New Zealand Animal Welfare Act 1999. The majority of genotype and phenotype data were  
789 generated as part of routine commercial activities outside the scope of that requiring formal  
790 committee assessment (as defined by the above guidelines).

791 **Competing interests**

792 TL, YW, KT, CSH, TJJJ, CN, KC, RGS, CC, SRD, BLH, RJS, MDL are employees of Livestock  
793 Improvement Corporation (LIC; Hamilton, New Zealand), a commercial provider of bovine  
794 germplasm. Livestock Improvement Corporation is the applicant for several patent applications  
795 related to some of the mutations detailed in this article, with EGMR and MDL named inventors  
796 on these applications. Specifically, these filed patents relate to genetic testing applications  
797 of mutations impacting the DOCK8 (768802), IL4R (768803), KIAA0556 (768804), ITGAL  
798 (777216) LRCH4 (768805), and RBM34 (768806) genes. All other authors declare that they have  
799 no competing interests.

800

801



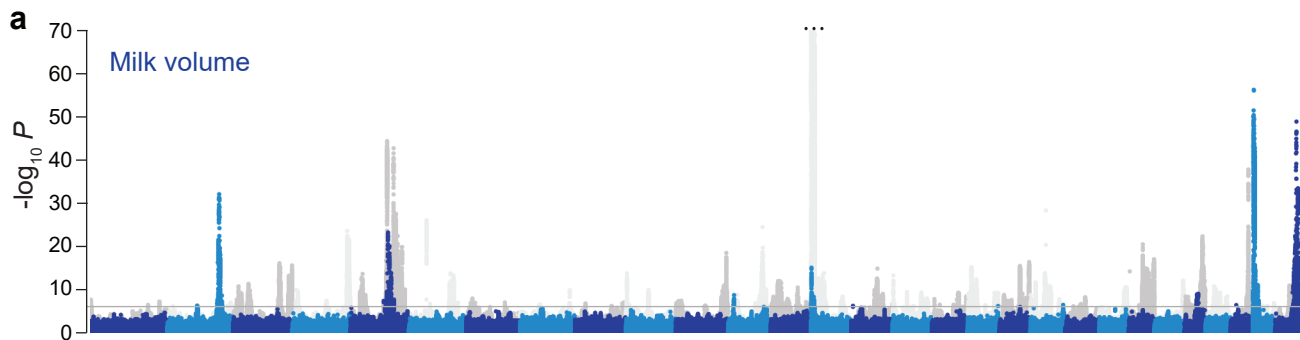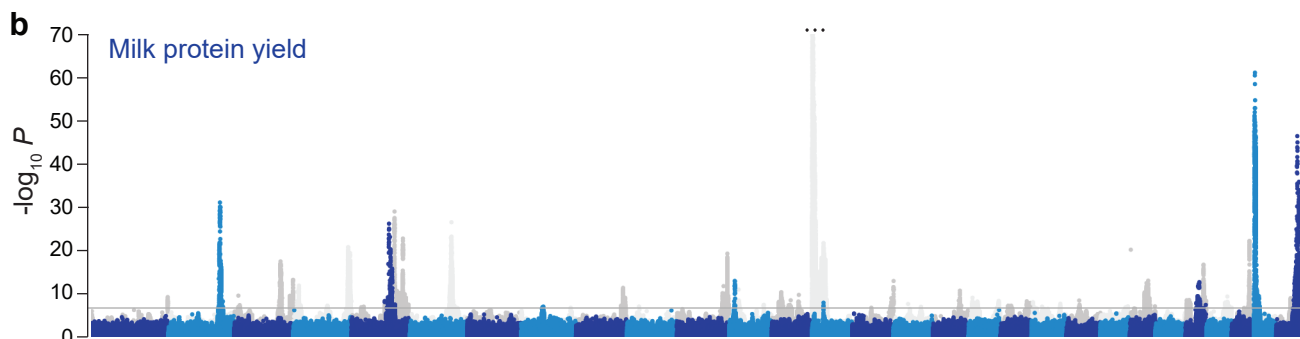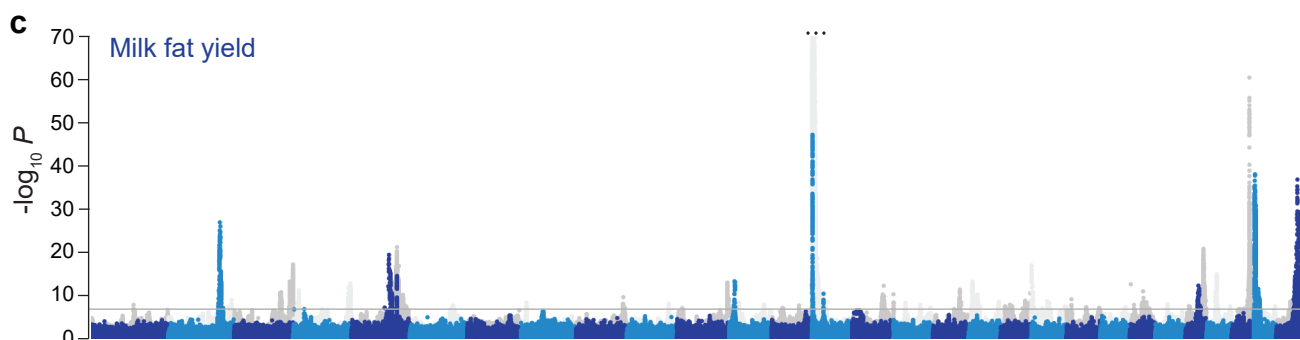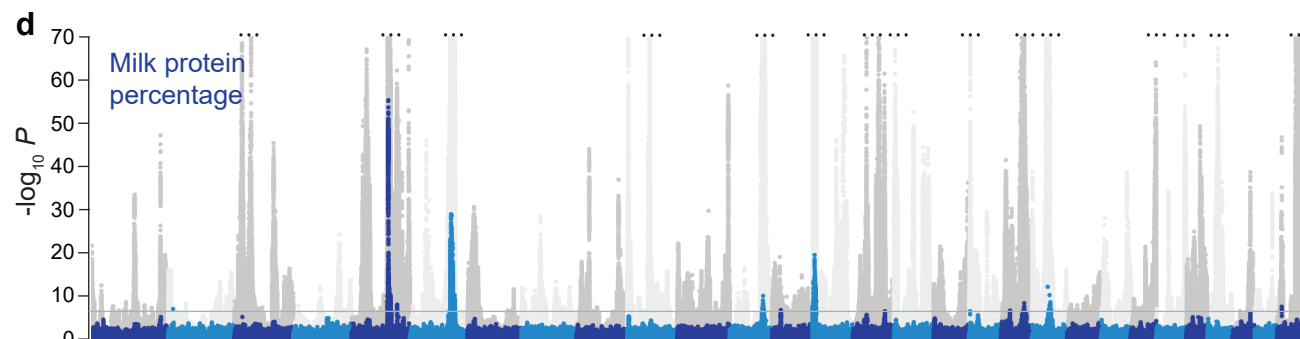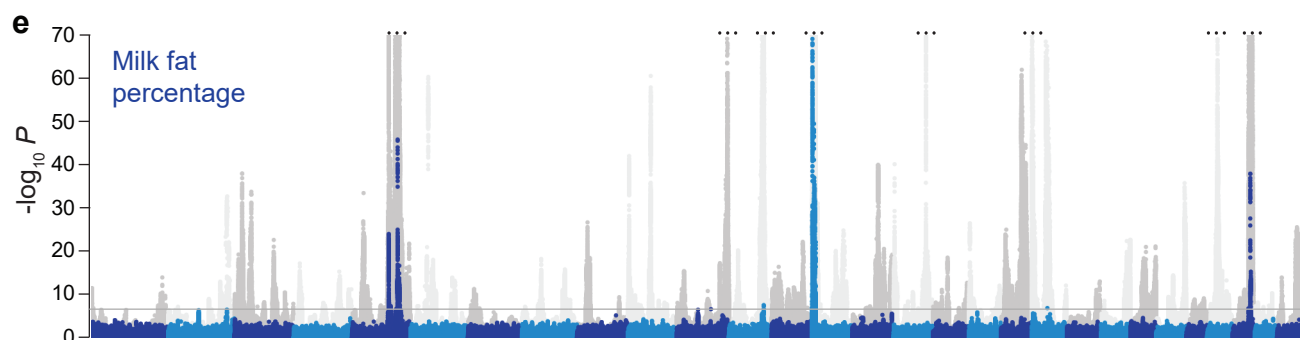

**a)**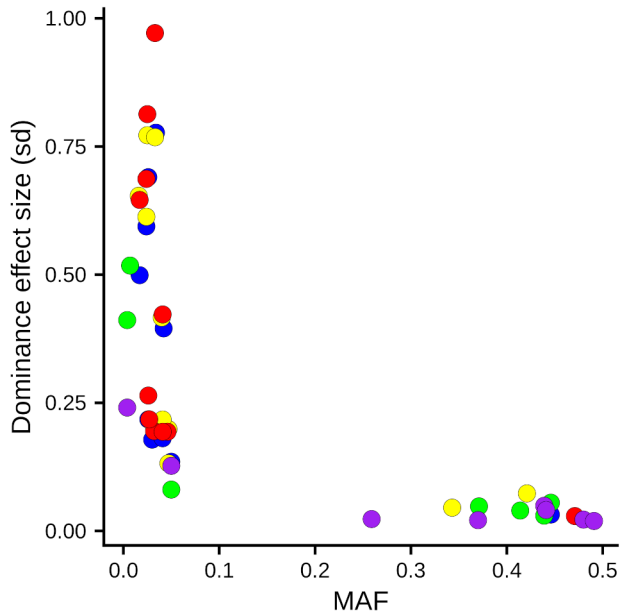**b)**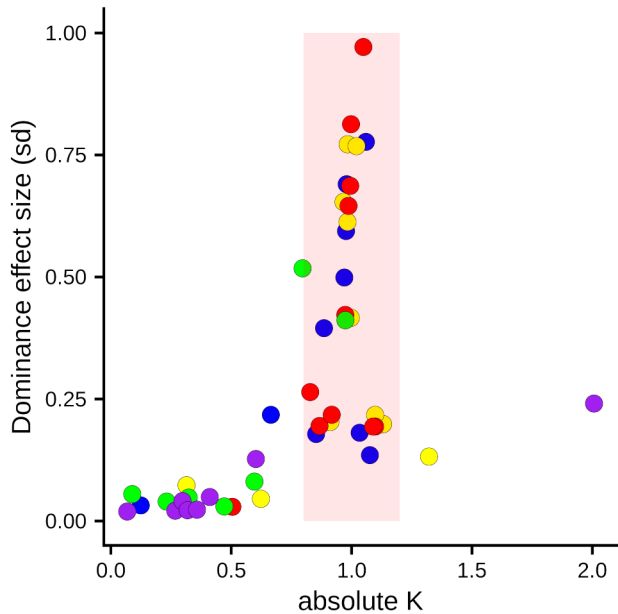

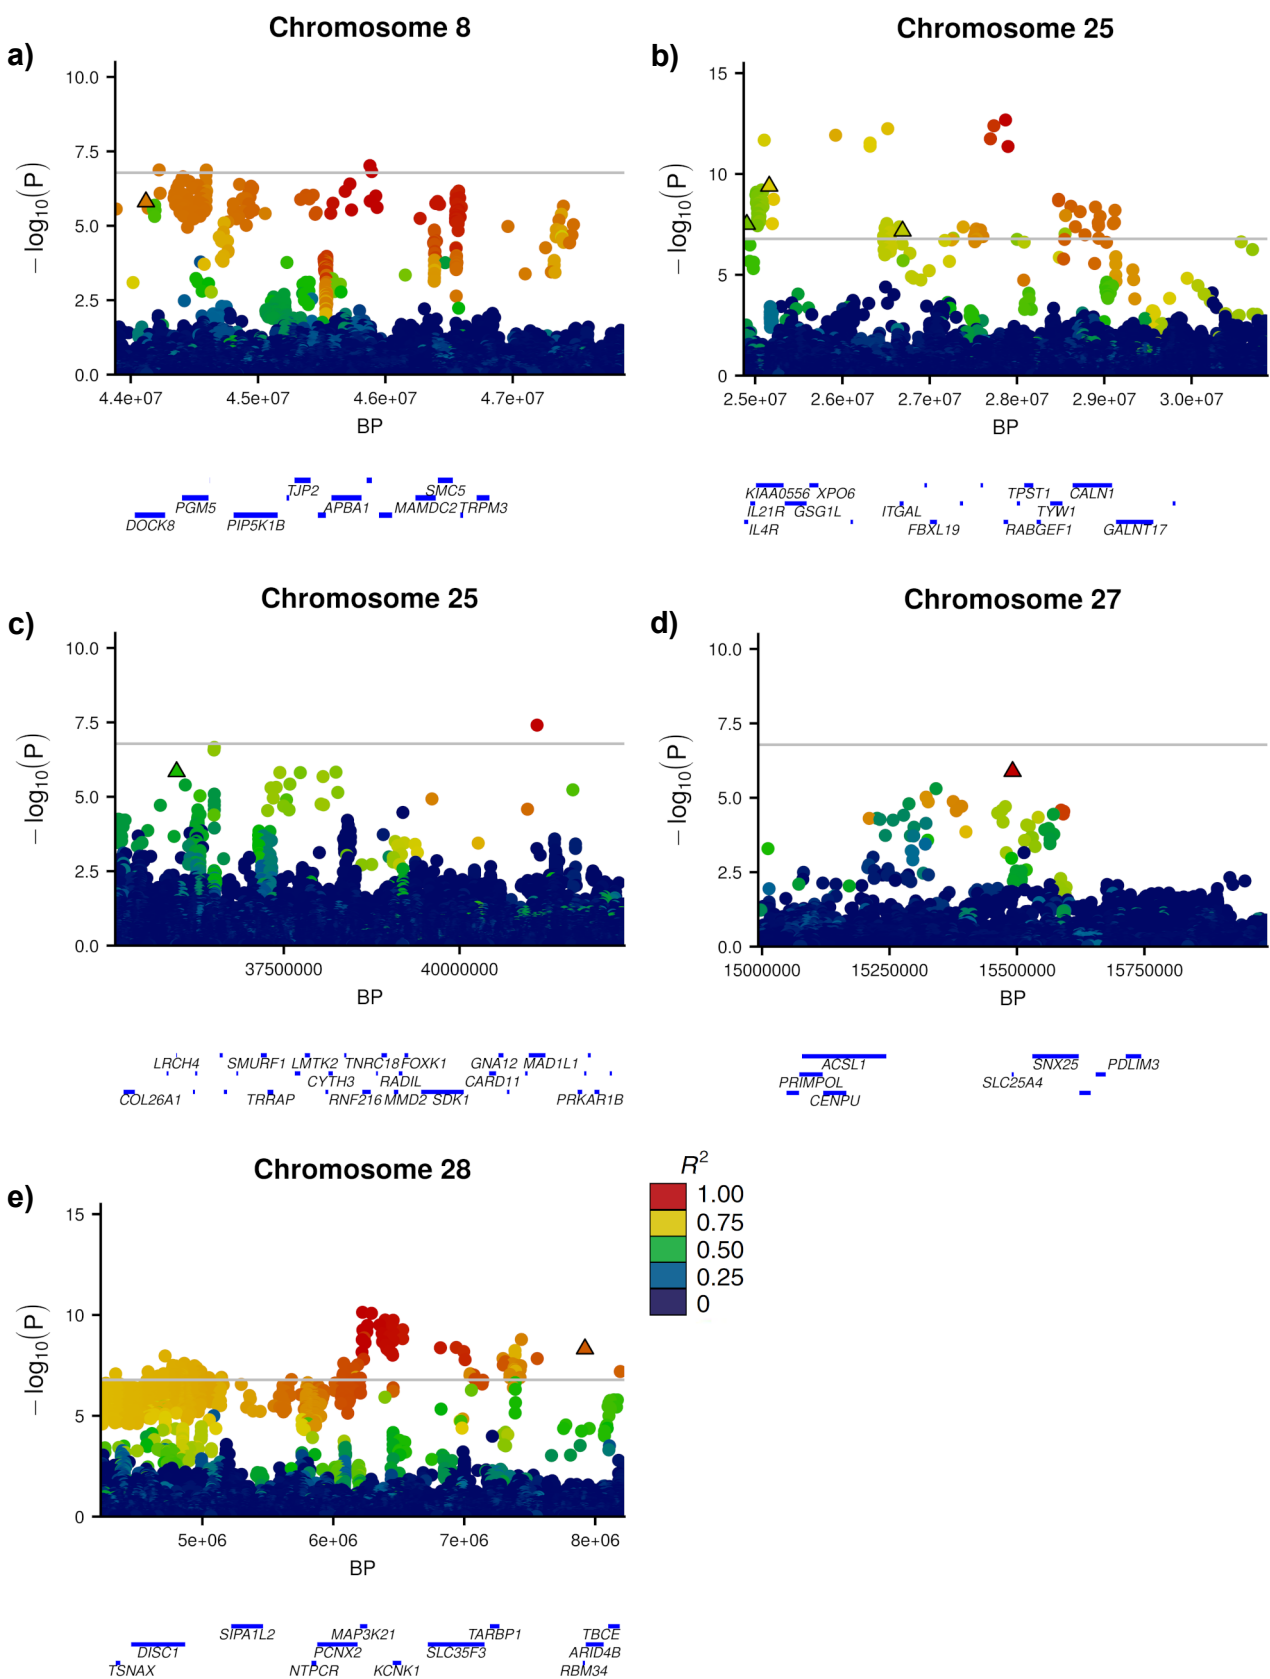

### Milk volume

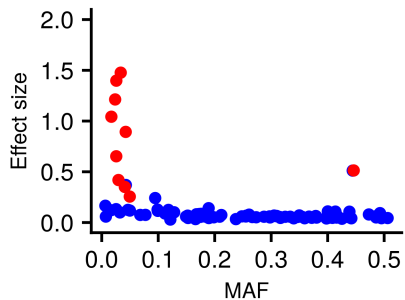

### Milk fat yield

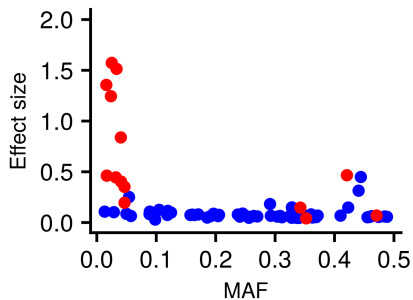

### Milk protein yield

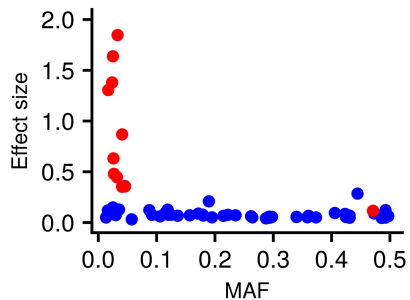

### Milk fat percentage

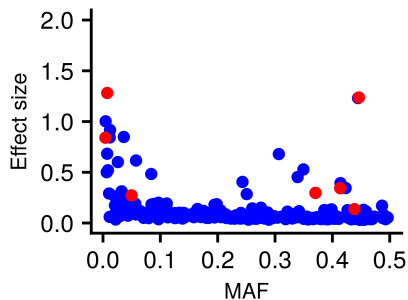

### Milk protein percentage

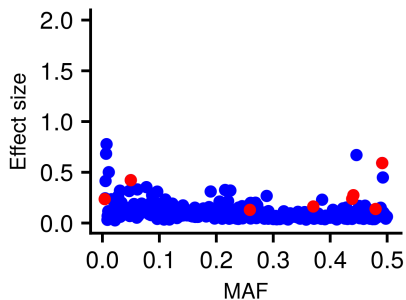

Iteration 0

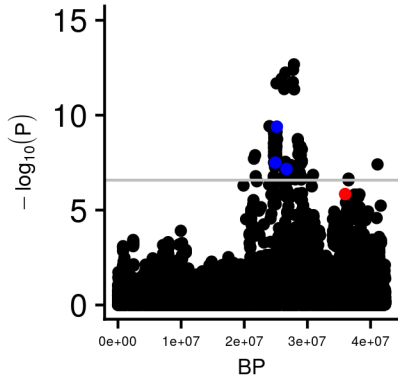

Iteration 1

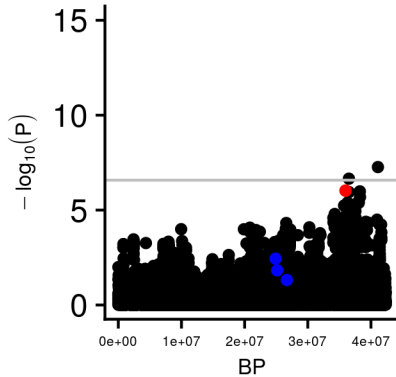

Iteration 2

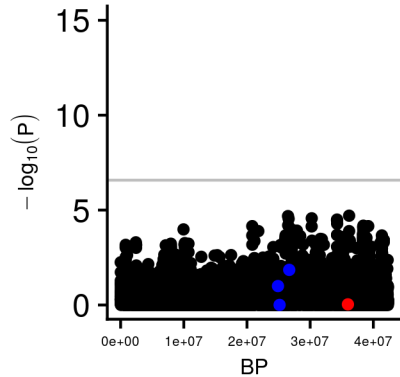

Iteration 0

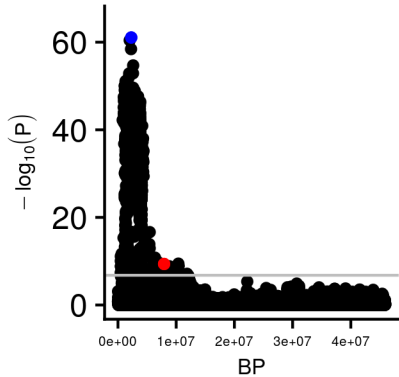

Iteration 1

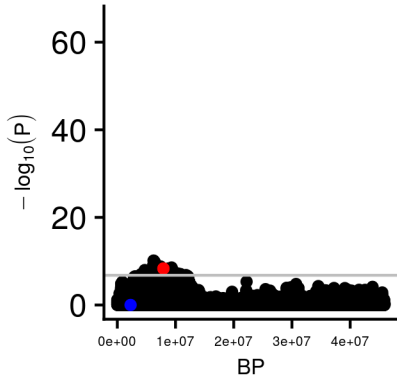

Iteration 2

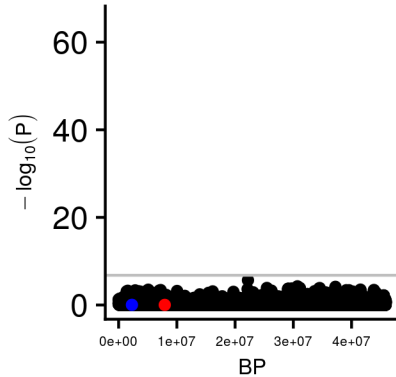

Source: https://www.biorxiv.org/content/10.1101/2021.08.30.457863v1.full.pdf
